# Supplementary material
Source: PubMed Central journal article supplement (PMC4747042)
Supplement: NIHMS118311-supplement-Supp_Tables_S1-S2_and_Figures_S1-S3.pdf [file NIHMS118311-supplement-Supp_Tables_S1-S2_and_Figures_S1-S3.pdf]

**Table S1. Expression indices for genes in *M. tuberculosis* during non-replicating persistence.**  
*Entries putatively involved in respiration are highlighted.*

| <b>ORF<sup>a</sup></b> | <b>Name<sup>a</sup></b> | <b>Functional Class<sup>a</sup></b>     | <b>Expression index<sup>b</sup></b> | <b>Variance<sup>c</sup></b> |
|------------------------|-------------------------|-----------------------------------------|-------------------------------------|-----------------------------|
| Rv0001                 | <i>dnaA</i>             | information pathways                    | 3.1                                 | 0.0020                      |
| Rv0009                 | <i>ppiA</i>             | information pathways                    | 4.6                                 | 0.0001                      |
| Rv0020c                | Rv0020c                 | conserved hypotheticals                 | 3.3                                 | 0.0001                      |
| Rv0040c                | Rv0040c                 | conserved hypotheticals                 | 2.6                                 | 0.0009                      |
| Rv0046c                | Rv0046c                 | conserved hypotheticals                 | 2.3                                 | 0.0000                      |
| Rv0056                 | <i>rplI</i>             | information pathways                    | 2.9                                 | 0.0000                      |
| Rv0068                 | Rv0068                  | intermediary metabolism and respiration | 1.4                                 | 0.0010                      |
| Rv0127                 | Rv0127                  | conserved hypotheticals                 | 1.6                                 | 0.0047                      |
| Rv0141c                | Rv0141c                 | unknown                                 | 1.1                                 | 0.0064                      |
| Rv0144                 | Rv0144                  | regulatory proteins                     | 1.1                                 | 0.0067                      |
| Rv0157                 | <i>pntB</i>             | intermediary metabolism and respiration | 3.6                                 | 0.0004                      |
| Rv0164                 | Rv0164                  | conserved hypotheticals                 | 3.2                                 | 0.0001                      |
| Rv0165c                | Rv0165c                 | regulatory proteins                     | 1.1                                 | 0.0000                      |
| Rv0167                 | Rv0167                  | virulence, detoxification, adaptation   | 2.3                                 | 0.0054                      |
| Rv0170                 | Rv0170                  | virulence, detoxification, adaptation   | 3.2                                 | 0.0001                      |
| Rv0171                 | Rv0171                  | virulence, detoxification, adaptation   | 2.8                                 | 0.0026                      |
| Rv0172                 | Rv0172                  | virulence, detoxification, adaptation   | 3.3                                 | 0.0003                      |
| Rv0173                 | <i>lprK</i>             | cell wall and cell processes            | 3.3                                 | 0.0083                      |
| Rv0174                 | Rv0174                  | virulence, detoxification, adaptation   | 2.8                                 | 0.0015                      |
| Rv0176                 | Rv0176                  | conserved hypotheticals                 | 3.0                                 | 0.0000                      |
| Rv0177                 | Rv0177                  | conserved hypotheticals                 | 1.9                                 | 0.0085                      |
| Rv0221                 | Rv0221                  | conserved hypotheticals                 | 1.5                                 | 0.0038                      |
| Rv0222                 | <i>echA1</i>            | lipid metabolism                        | 2.6                                 | 0.0001                      |
| Rv0227c                | Rv0227c                 | cell wall and cell processes            | 3.4                                 | 0.0032                      |
| Rv0232                 | Rv0232                  | regulatory proteins                     | 2.4                                 | 0.0046                      |
| Rv0234c                | <i>gabD2</i>            | intermediary metabolism and respiration | 3.2                                 | 0.0096                      |
| Rv0247c                | Rv0247c                 | intermediary metabolism and respiration | 3.2                                 | 0.0024                      |
| Rv0248c                | Rv0248c                 | intermediary metabolism and respiration | 1.8                                 | 0.0053                      |
| Rv0249c                | Rv0249c                 | cell wall and cell processes            | 2.7                                 | 0.0029                      |
| Rv0257c                | Rv0257c                 | unknown                                 | 1.3                                 | 0.0074                      |
| Rv0259c                | Rv0259c                 | conserved hypotheticals                 | 1.2                                 | 0.0018                      |
| Rv0265c                | <i>fecB2</i>            | cell wall and cell processes            | 1.2                                 | 0.0059                      |
| Rv0269c                | Rv0269c                 | conserved hypotheticals                 | 1.5                                 | 0.0018                      |
| Rv0281                 | Rv0281                  | conserved hypotheticals                 | 1.2                                 | 0.0035                      |
| Rv0284                 | Rv0284                  | conserved hypotheticals                 | 1.9                                 | 0.0010                      |
| Rv0286                 | <i>PPE</i>              | PE/PPE                                  | 1.7                                 | 0.0013                      |
| Rv0287                 | Rv0287                  | regulatory proteins                     | 1.7                                 | 0.0000                      |
| Rv0288                 | Rv0288                  | conserved hypotheticals                 | 1.7                                 | 0.0007                      |
| Rv0290                 | Rv0290                  | cell wall and cell processes            | 1.1                                 | 0.0089                      |
| Rv0309                 | Rv0309                  | unknown                                 | 4.8                                 | 0.0038                      |
| Rv0331                 | Rv0331                  | intermediary metabolism and respiration | 2.3                                 | 0.0065                      |
| Rv0334                 | <i>rmlA</i>             | intermediary metabolism and respiration | 1.3                                 | 0.0004                      |
| Rv0338c                | Rv0338c                 | conserved hypotheticals                 | 1.7                                 | 0.0028                      |
| Rv0341                 | Rv0341                  | conserved hypotheticals                 | 1.7                                 | 0.0002                      |
| Rv0343                 | Rv0343                  | conserved hypotheticals                 | 2.0                                 | 0.0075                      |
| Rv0361                 | Rv0361                  | cell wall and cell processes            | 1.5                                 | 0.0038                      |
| Rv0364                 | Rv0364                  | conserved hypotheticals                 | 1.7                                 | 0.0003                      |
| Rv0379                 | <i>sec</i>              | cell wall and cell processes            | 4.3                                 | 0.0044                      |
| Rv0413                 | <i>mutT3</i>            | information pathways                    | 1.2                                 | 0.0010                      |

|         |                |                                         |      |        |
|---------|----------------|-----------------------------------------|------|--------|
| Rv0419  | <i>lpqM</i>    | cell wall and cell processes            | 1.4  | 0.0025 |
| Rv0424c | <i>Rv0424c</i> | unknown                                 | 2.0  | 0.0012 |
| Rv0425c | <i>ctpH</i>    | cell wall and cell processes            | 2.4  | 0.0006 |
| Rv0430  | <i>Rv0430</i>  | unknown                                 | 5.5  | 0.0068 |
| Rv0432  | <i>sodC</i>    | virulence, detoxification, adaptation   | 3.0  | 0.0002 |
| Rv0433  | <i>Rv0433</i>  | conserved hypotheticals                 | 4.7  | 0.0030 |
| Rv0434  | <i>Rv0434</i>  | conserved hypotheticals                 | 1.0  | 0.0039 |
| Rv0440  | <i>groEL2</i>  | virulence, detoxification, adaptation   | 2.1  | 0.0033 |
| Rv0447c | <i>ufaA1</i>   | lipid metabolism                        | 3.0  | 0.0056 |
| Rv0448c | <i>Rv0448c</i> | conserved hypotheticals                 | 1.6  | 0.0017 |
| Rv0462  | <i>Rv0462</i>  | intermediary metabolism and respiration | 1.8  | 0.0070 |
| Rv0464c | <i>Rv0464c</i> | conserved hypotheticals                 | 2.3  | 0.0046 |
| Rv0466  | <i>Rv0466</i>  | conserved hypotheticals                 | 3.0  | 0.0000 |
| Rv0469  | <i>umaA1</i>   | lipid metabolism                        | 5.7  | 0.0065 |
| Rv0470c | <i>umaA2</i>   | lipid metabolism                        | 1.5  | 0.0000 |
| Rv0479c | <i>Rv0479c</i> | cell wall and cell processes            | 2.8  | 0.0003 |
| Rv0485  | <i>Rv0485</i>  | regulatory proteins                     | 2.4  | 0.0106 |
| Rv0489  | <i>gpm</i>     | intermediary metabolism and respiration | 3.4  | 0.0007 |
| Rv0501  | <i>galE1</i>   | intermediary metabolism and respiration | 3.7  | 0.0023 |
| Rv0502  | <i>Rv0502</i>  | conserved hypotheticals                 | 1.1  | 0.0003 |
| Rv0503c | <i>cmaA2</i>   | lipid metabolism                        | 2.5  | 0.0026 |
| Rv0510  | <i>hemC</i>    | intermediary metabolism and respiration | 2.1  | 0.0002 |
| Rv0523c | <i>Rv0523c</i> | conserved hypotheticals                 | 1.2  | 0.0011 |
| Rv0532  | <i>PE_PGRS</i> | PE/PPE                                  | 1.2  | 0.0076 |
| Rv0545c | <i>pitA</i>    | cell wall and cell processes            | 2.2  | 0.0052 |
| Rv0554  | <i>bpoC</i>    | virulence, detoxification, adaptation   | 7.2  | 0.0031 |
| Rv0561c | <i>Rv0561c</i> | intermediary metabolism and respiration | 1.3  | 0.0090 |
| Rv0578c | <i>PE_PGRS</i> | PE/PPE                                  | 1.3  | 0.0003 |
| Rv0608  | <i>Rv0608</i>  | conserved hypotheticals                 | 1.9  | 0.0042 |
| Rv0613c | <i>Rv0613c</i> | unknown                                 | 4.7  | 0.0023 |
| Rv0620  | <i>galK</i>    | intermediary metabolism and respiration | 1.7  | 0.0004 |
| Rv0627  | <i>Rv0627</i>  | conserved hypotheticals                 | 1.6  | 0.0007 |
| Rv0632c | <i>echA3</i>   | lipid metabolism                        | 2.4  | 0.0011 |
| Rv0636  | <i>Rv0636</i>  | unknown                                 | 2.0  | 0.0069 |
| Rv0637  | <i>Rv0637</i>  | conserved hypotheticals                 | 4.0  | 0.0047 |
| Rv0642c | <i>mmaA4</i>   | lipid metabolism                        | 5.0  | 0.0008 |
| Rv0643c | <i>mmaA3</i>   | lipid metabolism                        | 4.5  | 0.0028 |
| Rv0655  | <i>Rv0655</i>  | cell wall and cell processes            | 1.4  | 0.0012 |
| Rv0667  | <i>rpoB</i>    | information pathways                    | 1.1  | 0.0097 |
| Rv0679c | <i>Rv0679c</i> | cell wall and cell processes            | 1.7  | 0.0103 |
| Rv0682  | <i>rpsL</i>    | information pathways                    | 2.5  | 0.0023 |
| Rv0685  | <i>tuf</i>     | information pathways                    | 2.2  | 0.0002 |
| Rv0692  | <i>Rv0692</i>  | unknown                                 | 8.6  | 0.0000 |
| Rv0693  | <i>pqqE</i>    | intermediary metabolism and respiration | 12.8 | 0.0057 |
| Rv0700  | <i>rpsJ</i>    | information pathways                    | 2.0  | 0.0059 |
| Rv0701  | <i>rplC</i>    | information pathways                    | 1.2  | 0.0073 |
| Rv0702  | <i>rplD</i>    | information pathways                    | 2.4  | 0.0035 |
| Rv0703  | <i>rplW</i>    | information pathways                    | 2.9  | 0.0016 |
| Rv0704  | <i>rplB</i>    | information pathways                    | 1.8  | 0.0054 |
| Rv0705  | <i>rpsS</i>    | information pathways                    | 1.5  | 0.0020 |
| Rv0710  | <i>rpsQ</i>    | information pathways                    | 4.2  | 0.0017 |
| Rv0711  | <i>atsA</i>    | intermediary metabolism and respiration | 1.2  | 0.0068 |
| Rv0714  | <i>rplN</i>    | information pathways                    | 2.4  | 0.0001 |

|         |                |                                         |     |        |
|---------|----------------|-----------------------------------------|-----|--------|
| Rv0715  | <i>rplX</i>    | information pathways                    | 2.1 | 0.0028 |
| Rv0716  | <i>rplE</i>    | information pathways                    | 3.1 | 0.0000 |
| Rv0717  | <i>rpsN</i>    | information pathways                    | 4.7 | 0.0015 |
| Rv0719  | <i>rplF</i>    | information pathways                    | 3.9 | 0.0006 |
| Rv0721  | <i>rpsE</i>    | information pathways                    | 1.1 | 0.0004 |
| Rv0731c | Rv0731c        | conserved hypotheticals                 | 1.3 | 0.0000 |
| Rv0732  | <i>secY</i>    | cell wall and cell processes            | 3.5 | 0.0041 |
| Rv0733  | <i>adk</i>     | intermediary metabolism and respiration | 4.2 | 0.0036 |
| Rv0741  | Rv0741         | insertion seqs and phages               | 1.2 | 0.0003 |
| Rv0748  | Rv0748         | conserved hypotheticals                 | 1.6 | 0.0033 |
| Rv0755c | <i>PPE</i>     | PE/PPE                                  | 1.4 | 0.0106 |
| Rv0759c | Rv0759c        | conserved hypotheticals                 | 2.4 | 0.0019 |
| Rv0760c | Rv0760c        | conserved hypotheticals                 | 4.6 | 0.0039 |
| Rv0761c | <i>adhB</i>    | intermediary metabolism and respiration | 4.5 | 0.0105 |
| Rv0809  | <i>purM</i>    | intermediary metabolism and respiration | 3.1 | 0.0000 |
| Rv0814c | <i>sseC2</i>   | intermediary metabolism and respiration | 4.1 | 0.0015 |
| Rv0815c | <i>cysA2</i>   | intermediary metabolism and respiration | 4.3 | 0.0000 |
| Rv0831c | Rv0831c        | conserved hypotheticals                 | 2.5 | 0.0016 |
| Rv0857  | Rv0857         | conserved hypotheticals                 | 3.0 | 0.0000 |
| Rv0863  | Rv0863         | conserved hypotheticals                 | 2.7 | 0.0003 |
| Rv0896  | <i>gltA2</i>   | intermediary metabolism and respiration | 2.9 | 0.0000 |
| Rv0905  | <i>echA6</i>   | lipid metabolism                        | 2.6 | 0.0032 |
| Rv0909  | Rv0909         | unknown                                 | 1.8 | 0.0032 |
| Rv0925c | Rv0925c        | unknown                                 | 4.6 | 0.0039 |
| Rv0931c | <i>pknD</i>    | regulatory proteins                     | 1.1 | 0.0027 |
| Rv0932c | <i>pstS</i>    | cell wall and cell processes            | 1.3 | 0.0064 |
| Rv0934  | <i>phoS1</i>   | cell wall and cell processes            | 3.3 | 0.0030 |
| Rv0951  | <i>sucC</i>    | intermediary metabolism and respiration | 5.0 | 0.0042 |
| Rv0952  | <i>sucD</i>    | intermediary metabolism and respiration | 3.4 | 0.0016 |
| Rv1013  | <i>pks16</i>   | lipid metabolism                        | 2.5 | 0.0000 |
| Rv1031  | <i>kdpC</i>    | cell wall and cell processes            | 2.1 | 0.0085 |
| Rv1074c | <i>fadA3</i>   | lipid metabolism                        | 1.2 | 0.0008 |
| Rv1076  | <i>lipU</i>    | intermediary metabolism and respiration | 3.0 | 0.0042 |
| Rv1078  | <i>pra</i>     | conserved hypotheticals                 | 4.3 | 0.0019 |
| Rv1083  | Rv1083         | conserved hypotheticals                 | 1.9 | 0.0009 |
| Rv1091  | <i>PE_PGRS</i> | PE/PPE                                  | 1.3 | 0.0000 |
| Rv1093  | <i>glyA</i>    | intermediary metabolism and respiration | 1.4 | 0.0036 |
| Rv1096  | Rv1096         | intermediary metabolism and respiration | 2.6 | 0.0084 |
| Rv1097c | Rv1097c        | cell wall and cell processes            | 1.5 | 0.0001 |
| Rv1103c | Rv1103c        | unknown                                 | 1.1 | 0.0014 |
| Rv1107c | <i>xseB</i>    | intermediary metabolism and respiration | 2.5 | 0.0009 |
| Rv1109c | Rv1109c        | unknown                                 | 1.4 | 0.0023 |
| Rv1113  | Rv1113         | unknown                                 | 1.2 | 0.0076 |
| Rv1119c | Rv1119c        | unknown                                 | 1.5 | 0.0007 |
| Rv1125  | Rv1125         | unknown                                 | 1.0 | 0.0072 |
| Rv1129c | Rv1129c        | regulatory proteins                     | 1.5 | 0.0023 |
| Rv1140  | Rv1140         | conserved hypotheticals                 | 1.4 | 0.0004 |
| Rv1142c | <i>echA10</i>  | lipid metabolism                        | 1.0 | 0.0012 |
| Rv1155  | Rv1155         | unknown                                 | 1.1 | 0.0034 |
| Rv1157c | Rv1157c        | conserved hypotheticals                 | 2.0 | 0.0000 |
| Rv1172c | <i>PE</i>      | PE/PPE                                  | 2.0 | 0.0002 |
| Rv1177  | <i>fdxC</i>    | intermediary metabolism and respiration | 1.9 | 0.0036 |
| Rv1182  | <i>papA3</i>   | lipid metabolism                        | 1.3 | 0.0033 |

|         |               |                                         |      |        |
|---------|---------------|-----------------------------------------|------|--------|
| Rv1185c | <i>fadD21</i> | lipid metabolism                        | 2.0  | 0.0065 |
| Rv1192  | Rv1192        | unknown                                 | 1.0  | 0.0015 |
| Rv1194c | Rv1194c       | conserved hypotheticals                 | 1.2  | 0.0057 |
| Rv1196  | PPE           | PE/PPE                                  | 3.4  | 0.0001 |
| Rv1197  | Rv1197        | conserved hypotheticals                 | 1.1  | 0.0101 |
| Rv1201c | Rv1201c       | conserved hypotheticals                 | 3.1  | 0.0024 |
| Rv1211  | Rv1211        | conserved hypotheticals                 | 1.2  | 0.0003 |
| Rv1215c | Rv1215c       | conserved hypotheticals                 | 3.8  | 0.0006 |
| Rv1233c | Rv1233c       | unknown                                 | 4.0  | 0.0015 |
| Rv1234  | Rv1234        | unknown                                 | 1.0  | 0.0080 |
| Rv1240  | <i>mdh</i>    | intermediary metabolism and respiration | 2.5  | 0.0002 |
| Rv1249c | Rv1249c       | cell wall and cell processes            | 2.4  | 0.0049 |
| Rv1261c | Rv1261c       | conserved hypotheticals                 | 2.0  | 0.0027 |
| Rv1270c | <i>lprA</i>   | cell wall and cell processes            | 3.2  | 0.0015 |
| Rv1274  | <i>lprB</i>   | cell wall and cell processes            | 1.7  | 0.0038 |
| Rv1277  | Rv1277        | unknown                                 | 2.2  | 0.0009 |
| Rv1293  | <i>lysA</i>   | intermediary metabolism and respiration | 1.4  | 0.0039 |
| Rv1295  | <i>thrC</i>   | intermediary metabolism and respiration | 3.1  | 0.0004 |
| Rv1304  | <i>atpB</i>   | intermediary metabolism and respiration | 14.8 | 0.0099 |
| Rv1305  | <i>atpE</i>   | intermediary metabolism and respiration | 3.8  | 0.0006 |
| Rv1306  | <i>atpF</i>   | intermediary metabolism and respiration | 11.1 | 0.0023 |
| Rv1307  | <i>atpH</i>   | intermediary metabolism and respiration | 4.9  | 0.0011 |
| Rv1308  | <i>atpA</i>   | intermediary metabolism and respiration | 8.4  | 0.0041 |
| Rv1309  | <i>atpG</i>   | intermediary metabolism and respiration | 5.4  | 0.0008 |
| Rv1310  | <i>atpD</i>   | intermediary metabolism and respiration | 5.6  | 0.0068 |
| Rv1311  | <i>atpC</i>   | intermediary metabolism and respiration | 4.0  | 0.0000 |
| Rv1312  | Rv1312        | conserved hypotheticals                 | 3.5  | 0.0035 |
| Rv1324  | Rv1324        | unknown                                 | 2.4  | 0.0001 |
| Rv1340  | <i>rphA</i>   | intermediary metabolism and respiration | 2.6  | 0.0051 |
| Rv1342c | <i>pkS14</i>  | lipid metabolism                        | 3.2  | 0.0009 |
| Rv1361c | PPE           | PE/PPE                                  | 6.2  | 0.0028 |
| Rv1379  | <i>pyrR</i>   | regulatory proteins                     | 3.2  | 0.0003 |
| Rv1391  | <i>dfp</i>    | intermediary metabolism and respiration | 1.3  | 0.0045 |
| Rv1392  | <i>metK</i>   | intermediary metabolism and respiration | 1.1  | 0.0005 |
| Rv1395  | Rv1395        | regulatory proteins                     | 1.4  | 0.0002 |
| Rv1410c | Rv1410c       | cell wall and cell processes            | 1.6  | 0.0004 |
| Rv1411c | <i>lprG</i>   | cell wall and cell processes            | 1.6  | 0.0018 |
| Rv1415  | <i>ribA2</i>  | intermediary metabolism and respiration | 2.7  | 0.0006 |
| Rv1418  | <i>lprH</i>   | cell wall and cell processes            | 1.1  | 0.0037 |
| Rv1423  | Rv1423        | regulatory proteins                     | 3.3  | 0.0042 |
| Rv1424c | Rv1424c       | cell wall and cell processes            | 1.1  | 0.0023 |
| Rv1425  | Rv1425        | conserved hypotheticals                 | 2.0  | 0.0010 |
| Rv1435c | Rv1435c       | conserved hypotheticals                 | 5.5  | 0.0039 |
| Rv1436  | <i>gap</i>    | intermediary metabolism and respiration | 2.8  | 0.0074 |
| Rv1445c | <i>devB</i>   | intermediary metabolism and respiration | 1.2  | 0.0017 |
| Rv1448c | <i>tal</i>    | intermediary metabolism and respiration | 4.5  | 0.0042 |
| Rv1449c | <i>tkt</i>    | intermediary metabolism and respiration | 1.2  | 0.0088 |
| Rv1451  | <i>ctaB</i>   | intermediary metabolism and respiration | 1.1  | 0.0102 |
| Rv1469  | <i>ctpD</i>   | cell wall and cell processes            | 1.4  | 0.0013 |
| Rv1475c | <i>acn</i>    | intermediary metabolism and respiration | 2.5  | 0.0005 |
| Rv1479  | <i>moxR</i>   | regulatory proteins                     | 1.1  | 0.0021 |
| Rv1499  | Rv1499        | unknown                                 | 1.6  | 0.0002 |
| Rv1515c | Rv1515c       | conserved hypotheticals                 | 2.0  | 0.0014 |

|                |                |                                         |     |        |
|----------------|----------------|-----------------------------------------|-----|--------|
| <i>Rv1517</i>  | <i>Rv1517</i>  | conserved hypotheticals                 | 1.0 | 0.0025 |
| <i>Rv1527c</i> | <i>pks5</i>    | lipid metabolism                        | 1.5 | 0.0001 |
| <i>Rv1576c</i> | <i>Rv1576c</i> | insertion seqs and phages               | 1.3 | 0.0000 |
| <i>Rv1584c</i> | <i>Rv1584c</i> | insertion seqs and phages               | 1.2 | 0.0009 |
| <i>Rv1591</i>  | <i>Rv1591</i>  | conserved hypotheticals                 | 2.5 | 0.0012 |
| <i>Rv1594</i>  | <i>nadA</i>    | intermediary metabolism and respiration | 5.0 | 0.0009 |
| <i>Rv1595</i>  | <i>nadB</i>    | intermediary metabolism and respiration | 3.5 | 0.0000 |
| <i>Rv1611</i>  | <i>trpC</i>    | intermediary metabolism and respiration | 3.5 | 0.0025 |
| <i>Rv1613</i>  | <i>trpA</i>    | intermediary metabolism and respiration | 2.8 | 0.0002 |
| <i>Rv1623c</i> | <i>appC</i>    | intermediary metabolism and respiration | 3.5 | 0.0000 |
| <i>Rv1626</i>  | <i>Rv1626</i>  | regulatory proteins                     | 3.6 | 0.0008 |
| <i>Rv1630</i>  | <i>rpsA</i>    | information pathways                    | 1.9 | 0.0018 |
| <i>Rv1643</i>  | <i>rplT</i>    | information pathways                    | 1.1 | 0.0004 |
| <i>Rv1676</i>  | <i>Rv1676</i>  | intermediary metabolism and respiration | 1.5 | 0.0005 |
| <i>Rv1677</i>  | <i>dsbF</i>    | cell wall and cell processes            | 5.0 | 0.0038 |
| <i>Rv1694</i>  | <i>tlyA</i>    | virulence, detoxification, adaptation   | 1.3 | 0.0023 |
| <i>Rv1697</i>  | <i>Rv1697</i>  | conserved hypotheticals                 | 4.8 | 0.0001 |
| <i>Rv1698</i>  | <i>Rv1698</i>  | conserved hypotheticals                 | 5.8 | 0.0090 |
| <i>Rv1700</i>  | <i>Rv1700</i>  | conserved hypotheticals                 | 2.1 | 0.0036 |
| <i>Rv1703c</i> | <i>Rv1703c</i> | intermediary metabolism and respiration | 2.7 | 0.0000 |
| <i>Rv1731</i>  | <i>gabD1</i>   | intermediary metabolism and respiration | 3.2 | 0.0009 |
| <i>Rv1743</i>  | <i>pknE</i>    | regulatory proteins                     | 1.5 | 0.0002 |
| <i>Rv1747</i>  | <i>Rv1747</i>  | cell wall and cell processes            | 4.7 | 0.0014 |
| <i>Rv1748</i>  | <i>Rv1748</i>  | unknown                                 | 1.4 | 0.0001 |
| <i>Rv1749c</i> | <i>Rv1749c</i> | cell wall and cell processes            | 3.4 | 0.0012 |
| <i>Rv1753c</i> | <i>PPE</i>     | PE/PPE                                  | 2.3 | 0.0076 |
| <i>Rv1770</i>  | <i>Rv1770</i>  | conserved hypotheticals                 | 1.4 | 0.0004 |
| <i>Rv1778c</i> | <i>Rv1778c</i> | unknown                                 | 1.1 | 0.0049 |
| <i>Rv1798</i>  | <i>Rv1798</i>  | conserved hypotheticals                 | 1.3 | 0.0015 |
| <i>Rv1807</i>  | <i>PPE</i>     | PE/PPE                                  | 2.5 | 0.0000 |
| <i>Rv1809</i>  | <i>PPE</i>     | PE/PPE                                  | 1.3 | 0.0093 |
| <i>Rv1810</i>  | <i>Rv1810</i>  | conserved hypotheticals                 | 1.7 | 0.0046 |
| <i>Rv1816</i>  | <i>Rv1816</i>  | regulatory proteins                     | 1.9 | 0.0041 |
| <i>Rv1821</i>  | <i>secA2</i>   | cell wall and cell processes            | 1.3 | 0.0029 |
| <i>Rv1837c</i> | <i>glcB</i>    | intermediary metabolism and respiration | 2.2 | 0.0083 |
| <i>Rv1843c</i> | <i>guaB1</i>   | intermediary metabolism and respiration | 1.2 | 0.0092 |
| <i>Rv1862</i>  | <i>adhA</i>    | intermediary metabolism and respiration | 1.0 | 0.0086 |
| <i>Rv1876</i>  | <i>bfrA</i>    | intermediary metabolism and respiration | 2.1 | 0.0049 |
| <i>Rv1883c</i> | <i>Rv1883c</i> | conserved hypotheticals                 | 1.5 | 0.0001 |
| <i>Rv1884c</i> | <i>Rv1884c</i> | conserved hypotheticals                 | 7.1 | 0.0081 |
| <i>Rv1887</i>  | <i>Rv1887</i>  | unknown                                 | 1.8 | 0.0007 |
| <i>Rv1903</i>  | <i>Rv1903</i>  | cell wall and cell processes            | 1.4 | 0.0031 |
| <i>Rv1904</i>  | <i>Rv1904</i>  | conserved hypotheticals                 | 1.1 | 0.0050 |
| <i>Rv1906c</i> | <i>Rv1906c</i> | conserved hypotheticals                 | 1.5 | 0.0026 |
| <i>Rv1909c</i> | <i>furA</i>    | regulatory proteins                     | 1.5 | 0.0007 |
| <i>Rv1916</i>  | <i>aceAb</i>   | intermediary metabolism and respiration | 1.0 | 0.0053 |
| <i>Rv1934c</i> | <i>fadE17</i>  | lipid metabolism                        | 2.1 | 0.0004 |
| <i>Rv1947</i>  | <i>Rv1947</i>  | unknown                                 | 4.9 | 0.0032 |
| <i>Rv1987</i>  | <i>Rv1987</i>  | cell wall and cell processes            | 4.8 | 0.0003 |
| <i>Rv2056c</i> | <i>rpsN2</i>   | information pathways                    | 1.7 | 0.0016 |
| <i>Rv2061c</i> | <i>Rv2061c</i> | unknown                                 | 3.9 | 0.0021 |
| <i>Rv2066</i>  | <i>cobI</i>    | intermediary metabolism and respiration | 1.4 | 0.0004 |
| <i>Rv2071c</i> | <i>cobM</i>    | intermediary metabolism and respiration | 2.5 | 0.0056 |

|         |               |                                         |     |        |
|---------|---------------|-----------------------------------------|-----|--------|
| Rv2074  | Rv2074        | unknown                                 | 2.3 | 0.0017 |
| Rv2080  | <i>lppJ</i>   | cell wall and cell processes            | 2.2 | 0.0022 |
| Rv2093c | Rv2093c       | cell wall and cell processes            | 1.3 | 0.0066 |
| Rv2109c | <i>prcA</i>   | intermediary metabolism and respiration | 1.2 | 0.0020 |
| Rv2119  | Rv2119        | conserved hypotheticals                 | 1.2 | 0.0068 |
| Rv2127  | <i>ansP</i>   | cell wall and cell processes            | 6.6 | 0.0038 |
| Rv2128  | Rv2128        | unknown                                 | 2.5 | 0.0014 |
| Rv2138  | <i>lppL</i>   | cell wall and cell processes            | 2.2 | 0.0013 |
| Rv2141c | <i>dapE2</i>  | intermediary metabolism and respiration | 1.3 | 0.0020 |
| Rv2145c | <i>wag31</i>  | cell wall and cell processes            | 1.8 | 0.0089 |
| Rv2147c | Rv2147c       | unknown                                 | 3.1 | 0.0048 |
| Rv2160c | Rv2160c       | unknown                                 | 1.8 | 0.0004 |
| Rv2165c | Rv2165c       | conserved hypotheticals                 | 2.5 | 0.0044 |
| Rv2171  | <i>lppM</i>   | cell wall and cell processes            | 2.7 | 0.0000 |
| Rv2175c | Rv2175c       | regulatory proteins                     | 1.5 | 0.0010 |
| Rv2181  | Rv2181        | cell wall and cell processes            | 1.5 | 0.0024 |
| Rv2185c | Rv2185c       | conserved hypotheticals                 | 3.1 | 0.0001 |
| Rv2187  | <i>fadD15</i> | lipid metabolism                        | 2.0 | 0.0001 |
| Rv2190c | Rv2190c       | virulence, detoxification, adaptation   | 8.3 | 0.0059 |
| Rv2191  | Rv2191        | information pathways                    | 2.1 | 0.0040 |
| Rv2193  | <i>ctaE</i>   | intermediary metabolism and respiration | 5.6 | 0.0076 |
| Rv2194  | <i>qcrC</i>   | intermediary metabolism and respiration | 5.4 | 0.0013 |
| Rv2195  | <i>qcrA</i>   | intermediary metabolism and respiration | 7.6 | 0.0001 |
| Rv2196  | <i>qcrB</i>   | intermediary metabolism and respiration | 5.5 | 0.0021 |
| Rv2199c | Rv2199c       | cell wall and cell processes            | 2.4 | 0.0009 |
| Rv2200c | <i>ctaC</i>   | intermediary metabolism and respiration | 5.6 | 0.0014 |
| Rv2209  | Rv2209        | cell wall and cell processes            | 2.1 | 0.0059 |
| Rv2239c | Rv2239c       | unknown                                 | 1.5 | 0.0004 |
| Rv2241  | <i>aceE</i>   | intermediary metabolism and respiration | 1.1 | 0.0001 |
| Rv2245  | <i>kasA</i>   | lipid metabolism                        | 1.7 | 0.0051 |
| Rv2259  | <i>adhE2</i>  | intermediary metabolism and respiration | 1.5 | 0.0044 |
| Rv2269c | Rv2269c       | unknown                                 | 1.6 | 0.0004 |
| Rv2271  | Rv2271        | unknown                                 | 6.0 | 0.0076 |
| Rv2275  | Rv2275        | unknown                                 | 1.1 | 0.0021 |
| Rv2283  | Rv2283        | unknown                                 | 2.1 | 0.0048 |
| Rv2291  | <i>sseB</i>   | intermediary metabolism and respiration | 1.9 | 0.0053 |
| Rv2309c | Rv2309c       | insertion seqs and phages               | 2.5 | 0.0059 |
| Rv2328  | <i>PE</i>     | PE/PPE                                  | 1.6 | 0.0003 |
| Rv2334  | <i>cysK</i>   | intermediary metabolism and respiration | 1.6 | 0.0060 |
| Rv2335  | <i>cysE</i>   | intermediary metabolism and respiration | 1.4 | 0.0001 |
| Rv2339  | <i>mmpL9</i>  | cell wall and cell processes            | 3.2 | 0.0001 |
| Rv2348c | Rv2348c       | unknown                                 | 2.8 | 0.0005 |
| Rv2370c | Rv2370c       | conserved hypotheticals                 | 2.1 | 0.0082 |
| Rv2375  | Rv2375        | unknown                                 | 1.0 | 0.0001 |
| Rv2376c | Rv2376c       | conserved hypotheticals                 | 3.0 | 0.0001 |
| Rv2391  | <i>nirA</i>   | intermediary metabolism and respiration | 4.2 | 0.0004 |
| Rv2392  | <i>cysH</i>   | intermediary metabolism and respiration | 2.3 | 0.0005 |
| Rv2421c | Rv2421c       | conserved hypotheticals                 | 1.7 | 0.0021 |
| Rv2428  | <i>ahpC</i>   | virulence, detoxification, adaptation   | 3.3 | 0.0000 |
| Rv2431c | <i>PE</i>     | PE/PPE                                  | 2.2 | 0.0062 |
| Rv2442c | <i>rplU</i>   | information pathways                    | 1.7 | 0.0014 |
| Rv2457c | <i>clpX</i>   | intermediary metabolism and respiration | 1.5 | 0.0003 |
| Rv2459  | Rv2459        | cell wall and cell processes            | 2.9 | 0.0009 |

|                |                |                                         |     |        |
|----------------|----------------|-----------------------------------------|-----|--------|
| <i>Rv2461c</i> | <i>clpP</i>    | intermediary metabolism and respiration | 1.2 | 0.0052 |
| <i>Rv2465c</i> | <i>rpi</i>     | intermediary metabolism and respiration | 1.3 | 0.0003 |
| <i>Rv2467</i>  | <i>pepD</i>    | intermediary metabolism and respiration | 2.2 | 0.0027 |
| <i>Rv2477c</i> | <i>Rv2477c</i> | cell wall and cell processes            | 2.1 | 0.0029 |
| <i>Rv2493</i>  | <i>Rv2493</i>  | conserved hypotheticals                 | 2.1 | 0.0035 |
| <i>Rv2500c</i> | <i>fadE19</i>  | lipid metabolism                        | 1.5 | 0.0000 |
| <i>Rv2503c</i> | <i>scoB</i>    | lipid metabolism                        | 1.3 | 0.0023 |
| <i>Rv2516c</i> | <i>Rv2516c</i> | unknown                                 | 2.3 | 0.0060 |
| <i>Rv2590</i>  | <i>fadD9</i>   | lipid metabolism                        | 1.3 | 0.0042 |
| <i>Rv2607</i>  | <i>pdxH</i>    | intermediary metabolism and respiration | 1.7 | 0.0016 |
| <i>Rv2673</i>  | <i>Rv2673</i>  | cell wall and cell processes            | 1.6 | 0.0009 |
| <i>Rv2706c</i> | <i>Rv2706c</i> | unknown                                 | 1.6 | 0.0000 |
| <i>Rv2794c</i> | <i>Rv2794c</i> | conserved hypotheticals                 | 3.1 | 0.0000 |
| <i>Rv2813</i>  | <i>Rv2813</i>  | cell wall and cell processes            | 2.0 | 0.0042 |
| <i>Rv2843</i>  | <i>Rv2843</i>  | unknown                                 | 1.7 | 0.0000 |
| <i>Rv2850c</i> | <i>Rv2850c</i> | intermediary metabolism and respiration | 1.1 | 0.0028 |
| <i>Rv2883c</i> | <i>pyrH</i>    | intermediary metabolism and respiration | 3.6 | 0.0007 |
| <i>Rv2899c</i> | <i>fdhD</i>    | intermediary metabolism and respiration | 1.5 | 0.0001 |
| <i>Rv2900c</i> | <i>fdhF</i>    | intermediary metabolism and respiration | 1.3 | 0.0022 |
| <i>Rv2908c</i> | <i>Rv2908c</i> | conserved hypotheticals                 | 2.1 | 0.0024 |
| <i>Rv2909c</i> | <i>rpsP</i>    | information pathways                    | 1.9 | 0.0032 |
| <i>Rv2914c</i> | <i>pknI</i>    | regulatory proteins                     | 1.1 | 0.0012 |
| <i>Rv2919c</i> | <i>glnB</i>    | regulatory proteins                     | 1.0 | 0.0028 |
| <i>Rv2927c</i> | <i>Rv2927c</i> | conserved hypotheticals                 | 9.2 | 0.0016 |
| <i>Rv2928</i>  | <i>tesA</i>    | lipid metabolism                        | 5.3 | 0.0021 |
| <i>Rv2929</i>  | <i>Rv2929</i>  | unknown                                 | 3.1 | 0.0017 |
| <i>Rv2930</i>  | <i>fadD26</i>  | lipid metabolism                        | 1.1 | 0.0082 |
| <i>Rv2937</i>  | <i>drrB</i>    | cell wall and cell processes            | 2.1 | 0.0002 |
| <i>Rv2950c</i> | <i>fadD29</i>  | lipid metabolism                        | 1.5 | 0.0010 |
| <i>Rv2954c</i> | <i>Rv2954c</i> | unknown                                 | 1.1 | 0.0063 |
| <i>Rv2956</i>  | <i>Rv2956</i>  | conserved hypotheticals                 | 3.4 | 0.0024 |
| <i>Rv2958c</i> | <i>Rv2958c</i> | intermediary metabolism and respiration | 1.3 | 0.0015 |
| <i>Rv2982c</i> | <i>gpdA2</i>   | lipid metabolism                        | 1.2 | 0.0011 |
| <i>Rv2994</i>  | <i>Rv2994</i>  | cell wall and cell processes            | 2.5 | 0.0068 |
| <i>Rv3028c</i> | <i>fixB</i>    | intermediary metabolism and respiration | 1.2 | 0.0099 |
| <i>Rv3029c</i> | <i>fixA</i>    | intermediary metabolism and respiration | 1.9 | 0.0023 |
| <i>Rv3043c</i> | <i>ctaD</i>    | intermediary metabolism and respiration | 1.2 | 0.0003 |
| <i>Rv3044</i>  | <i>fecB</i>    | cell wall and cell processes            | 1.1 | 0.0012 |
| <i>Rv3101c</i> | <i>ftsX</i>    | cell wall and cell processes            | 1.5 | 0.0036 |
| <i>Rv3117</i>  | <i>cysA3</i>   | intermediary metabolism and respiration | 3.9 | 0.0006 |
| <i>Rv3118</i>  | <i>sseC</i>    | intermediary metabolism and respiration | 3.5 | 0.0002 |
| <i>Rv3147</i>  | <i>nuoC</i>    | intermediary metabolism and respiration | 2.4 | 0.0008 |
| <i>Rv3148</i>  | <i>nuoD</i>    | intermediary metabolism and respiration | 2.2 | 0.0015 |
| <i>Rv3150</i>  | <i>nuoF</i>    | intermediary metabolism and respiration | 1.3 | 0.0075 |
| <i>Rv3151</i>  | <i>nuoG</i>    | intermediary metabolism and respiration | 3.6 | 0.0010 |
| <i>Rv3155</i>  | <i>nuoK</i>    | intermediary metabolism and respiration | 1.7 | 0.0053 |
| <i>Rv3157</i>  | <i>nuoM</i>    | intermediary metabolism and respiration | 1.6 | 0.0086 |
| <i>Rv3193c</i> | <i>Rv3193c</i> | cell wall and cell processes            | 2.2 | 0.0006 |
| <i>Rv3205c</i> | <i>Rv3205c</i> | unknown                                 | 1.4 | 0.0018 |
| <i>Rv3207c</i> | <i>Rv3207c</i> | unknown                                 | 1.6 | 0.0017 |
| <i>Rv3209</i>  | <i>Rv3209</i>  | conserved hypotheticals                 | 4.5 | 0.0013 |
| <i>Rv3211</i>  | <i>rhIE</i>    | information pathways                    | 1.0 | 0.0000 |
| <i>Rv3213c</i> | <i>Rv3213c</i> | cell wall and cell processes            | 3.3 | 0.0002 |

|         |              |                                         |     |        |
|---------|--------------|-----------------------------------------|-----|--------|
| Rv3224  | Rv3224       | intermediary metabolism and respiration | 1.2 | 0.0007 |
| Rv3246c | <i>mtrA</i>  | regulatory proteins                     | 2.1 | 0.0063 |
| Rv3260c | <i>whiB2</i> | regulatory proteins                     | 5.2 | 0.0021 |
| Rv3281  | Rv3281       | conserved hypotheticals                 | 2.5 | 0.0011 |
| Rv3285  | <i>accA3</i> | lipid metabolism                        | 1.2 | 0.0065 |
| Rv3307  | <i>deoD</i>  | intermediary metabolism and respiration | 2.1 | 0.0005 |
| Rv3320c | Rv3320c      | conserved hypotheticals                 | 1.7 | 0.0001 |
| Rv3334  | Rv3334       | regulatory proteins                     | 2.0 | 0.0060 |
| Rv3356c | <i>folD</i>  | intermediary metabolism and respiration | 1.0 | 0.0001 |
| Rv3376  | Rv3376       | conserved hypotheticals                 | 2.5 | 0.0040 |
| Rv3377c | Rv3377c      | intermediary metabolism and respiration | 1.7 | 0.0000 |
| Rv3387  | Rv3387       | insertion seqs and phages               | 1.9 | 0.0039 |
| Rv3390  | <i>lpqD</i>  | cell wall and cell processes            | 2.3 | 0.0002 |
| Rv3408  | Rv3408       | conserved hypotheticals                 | 1.0 | 0.0067 |
| Rv3409c | <i>choD</i>  | lipid metabolism                        | 1.4 | 0.0044 |
| Rv3413c | Rv3413c      | unknown                                 | 1.1 | 0.0071 |
| Rv3414c | <i>sigD</i>  | information pathways                    | 4.7 | 0.0032 |
| Rv3418c | <i>groES</i> | virulence, detoxification, adaptation   | 3.0 | 0.0018 |
| Rv3425  | PPE          | PE/PPE                                  | 1.4 | 0.0002 |
| Rv3429  | PPE          | PE/PPE                                  | 1.6 | 0.0001 |
| Rv3443c | <i>rplM</i>  | information pathways                    | 1.2 | 0.0102 |
| Rv3465  | <i>rmIC</i>  | intermediary metabolism and respiration | 1.3 | 0.0073 |
| Rv3476c | <i>kgtP</i>  | cell wall and cell processes            | 1.7 | 0.0001 |
| Rv3477  | PE           | PE/PPE                                  | 1.4 | 0.0031 |
| Rv3478  | PPE          | PE/PPE                                  | 4.4 | 0.0000 |
| Rv3495c | <i>lprN</i>  | cell wall and cell processes            | 4.8 | 0.0055 |
| Rv3497c | Rv3497c      | virulence, detoxification, adaptation   | 5.9 | 0.0033 |
| Rv3522  | Rv3522       | regulatory proteins                     | 1.7 | 0.0053 |
| Rv3524  | Rv3524       | cell wall and cell processes            | 1.7 | 0.0048 |
| Rv3528c | Rv3528c      | unknown                                 | 3.6 | 0.0001 |
| Rv3569c | Rv3569c      | intermediary metabolism and respiration | 1.5 | 0.0003 |
| Rv3597c | <i>lsr2</i>  | conserved hypotheticals                 | 1.5 | 0.0006 |
| Rv3624c | <i>hpt</i>   | intermediary metabolism and respiration | 3.5 | 0.0001 |
| Rv3635  | Rv3635       | cell wall and cell processes            | 2.0 | 0.0008 |
| Rv3648c | <i>cspA</i>  | virulence, detoxification, adaptation   | 4.9 | 0.0043 |
| Rv3669  | Rv3669       | unknown                                 | 2.1 | 0.0097 |
| Rv3673c | Rv3673c      | intermediary metabolism and respiration | 1.7 | 0.0001 |
| Rv3679  | Rv3679       | cell wall and cell processes            | 3.4 | 0.0068 |
| Rv3682  | <i>ponA'</i> | cell wall and cell processes            | 2.0 | 0.0008 |
| Rv3688c | Rv3688c      | conserved hypotheticals                 | 1.4 | 0.0039 |
| Rv3694c | Rv3694c      | conserved hypotheticals                 | 2.6 | 0.0064 |
| Rv3715c | <i>recR</i>  | information pathways                    | 1.2 | 0.0008 |
| Rv3720  | Rv3720       | lipid metabolism                        | 1.1 | 0.0017 |
| Rv3725  | Rv3725       | intermediary metabolism and respiration | 1.6 | 0.0026 |
| Rv3747  | Rv3747       | conserved hypotheticals                 | 1.3 | 0.0025 |
| Rv3749c | Rv3749c      | unknown                                 | 2.7 | 0.0017 |
| Rv3755c | Rv3755c      | unknown                                 | 1.1 | 0.0053 |
| Rv3757c | <i>proW</i>  | virulence, detoxification, adaptation   | 2.7 | 0.0071 |
| Rv3760  | Rv3760       | conserved hypotheticals                 | 1.0 | 0.0021 |
| Rv3763  | Rv3763       | cell wall and cell processes            | 3.2 | 0.0004 |
| Rv3771c | Rv3771c      | conserved hypotheticals                 | 1.8 | 0.0021 |
| Rv3775  | <i>lipE</i>  | intermediary metabolism and respiration | 2.1 | 0.0019 |
| Rv3779  | Rv3779       | cell wall and cell processes            | 2.0 | 0.0010 |



|                |                |                                         |     |        |
|----------------|----------------|-----------------------------------------|-----|--------|
| <i>Rv3795</i>  | <i>embB</i>    | cell wall and cell processes            | 2.6 | 0.0000 |
| <i>Rv3803c</i> | <i>fbpC1</i>   | lipid metabolism                        | 1.1 | 0.0093 |
| <i>Rv3804c</i> | <i>fbpA</i>    | lipid metabolism                        | 3.6 | 0.0003 |
| <i>Rv3806c</i> | <i>Rv3806c</i> | cell wall and cell processes            | 2.1 | 0.0043 |
| <i>Rv3809c</i> | <i>glf</i>     | cell wall and cell processes            | 1.2 | 0.0015 |
| <i>Rv3810</i>  | <i>pirG</i>    | cell wall and cell processes            | 4.4 | 0.0094 |
| <i>Rv3815c</i> | <i>Rv3815c</i> | intermediary metabolism and respiration | 2.1 | 0.0036 |
| <i>Rv3823c</i> | <i>mmpL8</i>   | cell wall and cell processes            | 1.1 | 0.0011 |
| <i>Rv3824c</i> | <i>papA1</i>   | lipid metabolism                        | 1.3 | 0.0004 |
| <i>Rv3846</i>  | <i>sodA</i>    | virulence, detoxification, adaptation   | 1.5 | 0.0056 |
| <i>Rv3853</i>  | <i>Rv3853</i>  | intermediary metabolism and respiration | 1.7 | 0.0068 |
| <i>Rv3864</i>  | <i>Rv3864</i>  | conserved hypotheticals                 | 1.2 | 0.0047 |
| <i>Rv3882c</i> | <i>Rv3882c</i> | conserved hypotheticals                 | 1.2 | 0.0020 |
| <i>Rv3920c</i> | <i>Rv3920c</i> | conserved hypotheticals                 | 1.1 | 0.0080 |
| <i>Rv3921c</i> | <i>Rv3921c</i> | cell wall and cell processes            | 1.1 | 0.0007 |

<sup>a</sup>ORF, gene and functional class as described <http://genolist.pasteur.fr/TubercuList/>

<sup>b</sup>expression index = 
$$\frac{\text{expression intensity of RvXXXX in NRP}/\text{mean channel expression intensity in NRP}}{\text{expression intensity of RvXXXX in growing cultures}/\text{mean channel intensity in growing cultures}}$$

<sup>c</sup>variance ANOVA calculated from independent biological replicates

Table S2. Structures of aminoalkoxydiphenylmethane derivatives.

| <b>Compound</b> | <b>Structure</b>                                                                    |
|-----------------|-------------------------------------------------------------------------------------|
| CSU-11          | 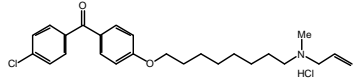  |
| CSU-12          |   |
| CSU-13          |   |
| CSU-17          |   |
| CSU-18          |   |
| CSU-20          |  |

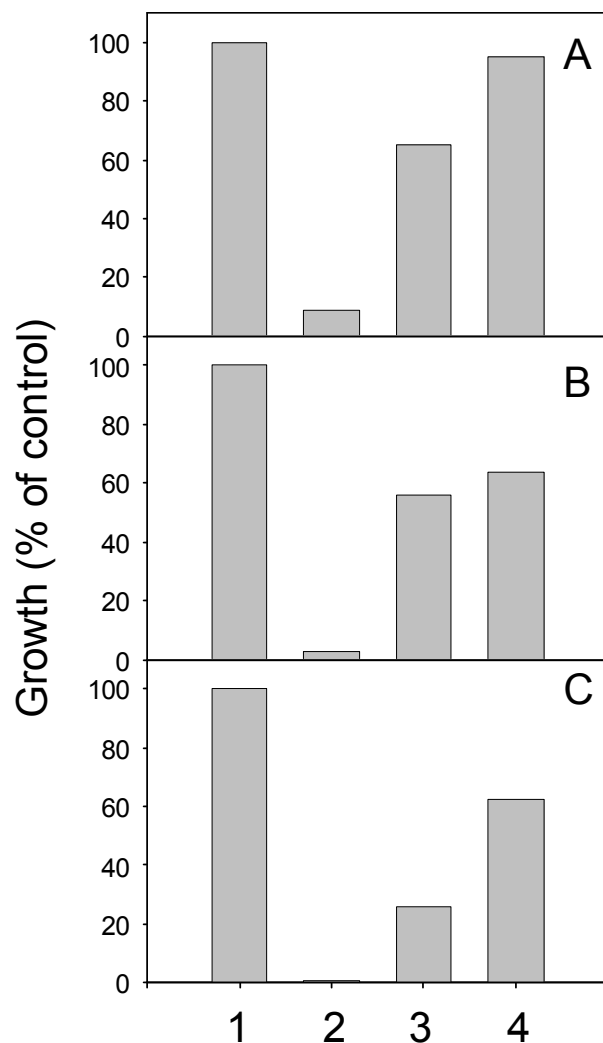

**Fig. S1. Rescue of bacterial growth and oxygen consumption by menaquinone (Vitamin K2) or phyloquinone (Vitamin K1).** *M. smegmatis* was cultured in the presence of 10 (Panel A), 20 (Panel B), or 40 μM (Panel C) Ro 48-8071. Lane 1: control (no Ro 48-8071); Lane 2: no supplementation; Lane 3: medium supplemented with 400 μM vitamin K1; Lane 4: medium supplemented with 400 μM Vitamin K2. Mid-log phase cultures (OD<sub>600</sub> of 0.5-0.8) grown in 7H9 medium (supplemented with oleic acid, albumin, dextrose and 0.05% Tween 80) were diluted 1:100 and dispensed into 48 well plates and treated with the indicated concentrations of Ro 48-8071 and vitamin K1 or K2.

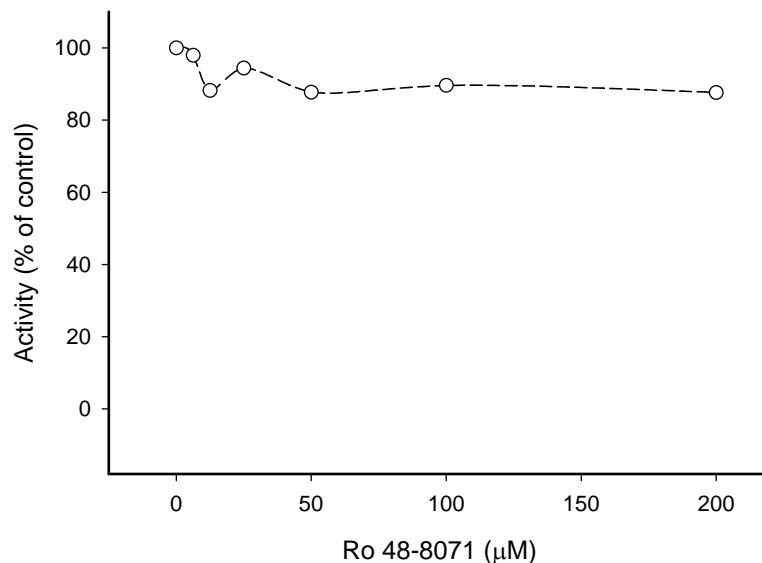

**Fig. S2.** The effect of Ro 48-8071 on total prenyl diphosphate activity in membranes isolated from *M. tuberculosis*. Prenyl diphosphate synthase activity was assayed essentially as previously published (Crick, D.C., Schulbach, M.C., Zink, E.E., Macchia, M., Barontini, S., Besra, G.S., and Brennan, P.J. (2000) Polyprenyl phosphate biosynthesis in *Mycobacterium tuberculosis* and *Mycobacterium smegmatis*. *J Bacteriol* **182**: 5771-5778). Reaction mixtures containing 50 mM MOPS (pH 7.9), 5 mM phosphatase inhibitor cocktail (Roche), 5 mM MgCl<sub>2</sub>, 2.5 mM dithiothreitol, 0.3% Triton X-100, 100 µM farnesyl diphosphate, 30 µM [<sup>14</sup>C]isopentenyl diphosphate, and 100 µg of *M. tuberculosis* membrane protein in a final volume of 200 µl were incubated at 37°C for 60 min. The reaction was stopped by the addition of 1 ml of water saturated with NaCl and radiolabeled products (prenyl diphosphates) were extracted with n-butanol saturated with water. An aliquot of the extract was taken and newly synthesized products were quantitated by liquid scintillation spectrometry.

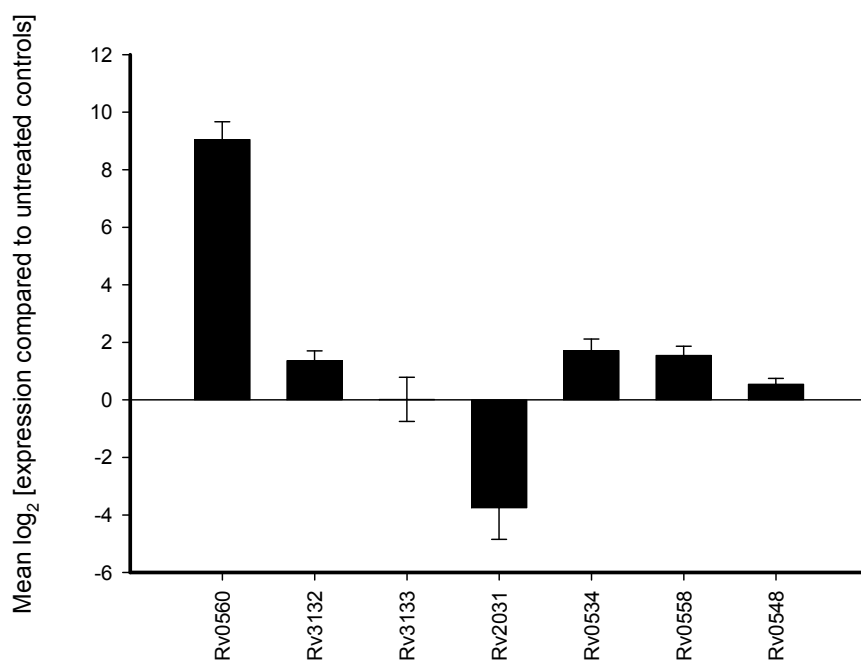

**Fig. S3.** Quantitative real-time PCR analysis of selected genes in response to treatment with Ro 48-8071. *M. tuberculosis* (H37Rv) was grown to early log phase and subsequently diluted to an OD<sub>600</sub> of 0.1 OD at 600nm in 7H9 medium containing OADC and some cultures were treated with 50  $\mu$ M Ro 48-8071 for 6 h at 37 °C. Total RNA was isolated as described in Methods and cDNA was generated using the SuperScript™ III First-Strand Synthesis System for RT-PCR (Invitrogen). Primer sequences were designed using the Primer3-web interface. QRT-PCR was performed with an iCycler iQ real-time PCR detection system (Bio-Rad Laboratories) using Platinum® SYBR® Green qPCR SuperMix UDG (Invitrogen). All reactions were performed in triplicate on independent total RNA preparations. Performance of each primer-set was evaluated using genomic DNA to establish specific amplification characteristics. The number of targets in each sample for each gene corresponding to the threshold cycle for each PCR was determined based on the specific standard curves generated for each primer set.

The relative number of transcripts for each gene was determined from standard curves established for each primer set by linear regression of data obtained using 100 ng, 10 ng, and 1 ng of *M. tuberculosis* (H37Rv) genomic DNA. Amplification results were visualized and analyzed using BioRad iCycler software and results for each gene was determined relative to paired untreated control. Data are average values +/- SD from three independent biological samples.
